# Supplementary material for: Fast synthesis of carbon microspheres via a microwave-assisted reaction for sodium ion batteries
Source: Royal Society of Chemistry journal article supplement (doi:10.1039/c3ta14037g), 2013-11-12
Supplement: c3ta14037g.pdf [file c3ta14037g.pdf]

## Fast synthesis of carbon microspheres via microwave-assisted reaction for sodium ion batteries

Taiqiang Chen<sup>a</sup>, Likun Pan<sup>\*a</sup>, Ting Lu<sup>a</sup>, Conglong Fu<sup>a</sup>, Daniel H. C. Chua<sup>b</sup> and Zhuo Sun<sup>a</sup>

<sup>a</sup> *Engineering Research Center for Nanophotonics & Advanced Instrument, Ministry of Education, Department of Physics, East China Normal University, Shanghai 200062, China, Fax: +86 21 62234321; Tel: +86 21 62234132; E-mail:*

*lkpan@phy.ecnu.edu.cn*

<sup>b</sup> *Department of Materials Science and Engineering, National University of Singapore 117574, Singapore*

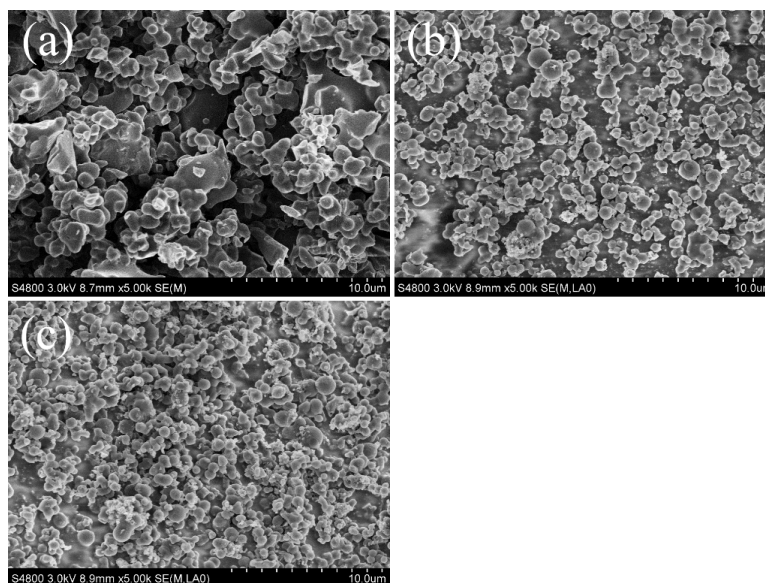

**Figure S1** FESEM images of (a) CS300, (b) CS700 and (c) CS1000. These materials have a spherical structure similar to that of CS500.

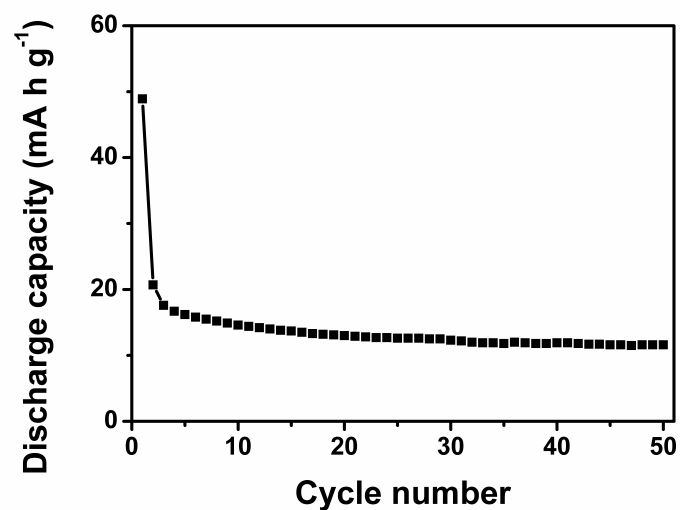

**Figure S2** Cycle performance of CS300. CS300 delivers an initial discharge capacity of 49 mA h g<sup>-1</sup> and maintains 12 mA h g<sup>-1</sup> after 50 cycles, showing poor electrochemical performance.
